# Supplementary material for: Evolution of C2H2-zinc finger genes revisited
Source: Springer Nature journal article supplement (doi:10.1186/1471-2148-9-51), 2009-01-01
Supplement: 12862_2008_965_MOESM7_ESM.pdf [file 12862_2008_965_MOESM7_ESM.pdf]

*T. rubripes*

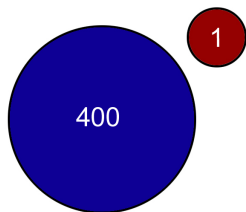

*X. tropicalis*

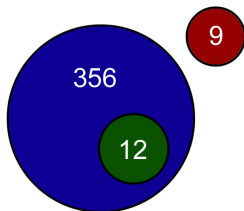

*G. gallus*

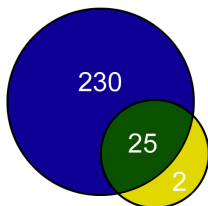

*H. sapiens*

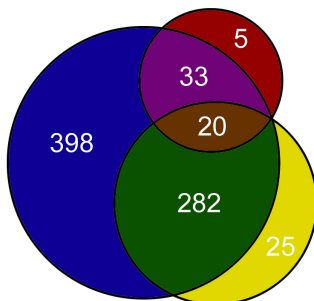

■ ZF-C2H2  
■ KRAB  
■ SCAN
